# Supplementary material for: Comparative transcriptome analysis of venom glands from Cotesia vestalis and Diadromus collaris, two endoparasitoids of the host Plutella xylostella
Source: PubMed Central journal article supplement (PMC5431001; doi:10.1038/s41598-017-01383-2), 2017-05-02
Supplement: 41598_2017_1383_MOESM1_ESM.pdf [file 41598_2017_1383_MOESM1_ESM.pdf]

**Comparative transcriptome analysis of venom glands from  
*Cotesia vestalis* and *Diadromus collaris*, two endoparasitoids  
of the host *Plutella xylostella***

Wei Zhao <sup>a,b</sup>, Min Shi <sup>a,b</sup>, Xi-qian Ye <sup>a,b</sup>, Fei Li <sup>a,b</sup>, Xiao-wei Wang <sup>a,b</sup>, Xue-xin Chen <sup>a,b,c,\*</sup>

<sup>a</sup> Institute of Insect Sciences, Zhejiang University, 866 Yuhangtang Road, Hangzhou 310058, China

<sup>b</sup> Ministry of Agriculture Key Lab of Agricultural Entomology, Zhejiang University, 866 Yuhangtang Road, Hangzhou 310058, China

<sup>c</sup> State Key Lab of Rice Biology, Zhejiang University, 866 Yuhangtang Road, Hangzhou 310058, China

**\*Corresponding author:** [xxchen@zju.edu.cn](mailto:xxchen@zju.edu.cn), phone number: +86 571 88982868

# A

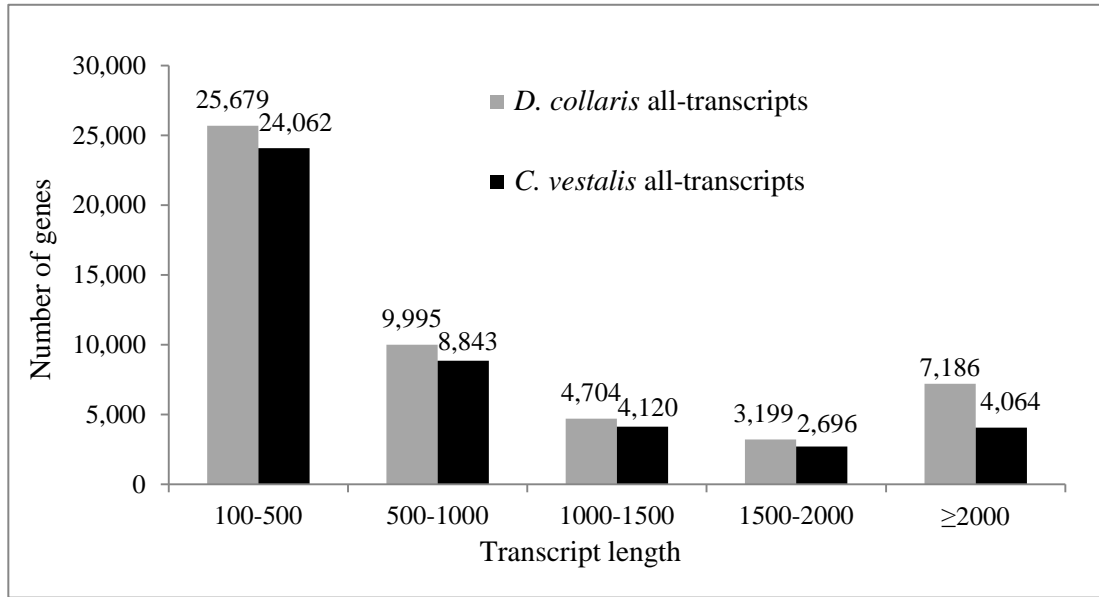

# B

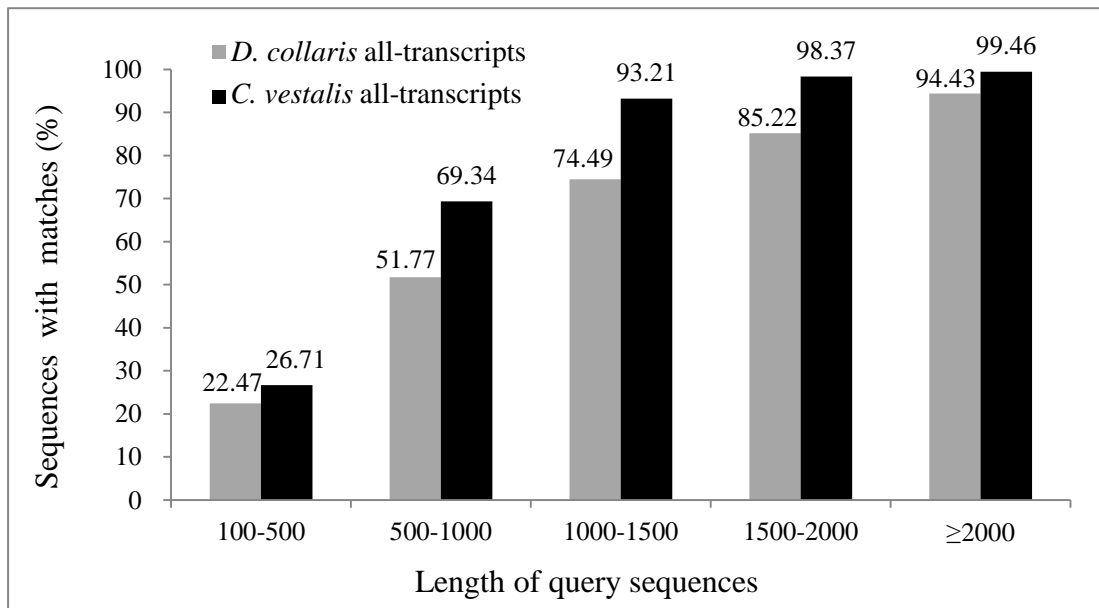

**Figure S1.** Size distribution for all-transcripts (A) and effect of query sequence length on the percentage of sequences for which significant matches were found (B).
